# Supplementary material
Source: PubMed Central journal article supplement (PMC5404890)

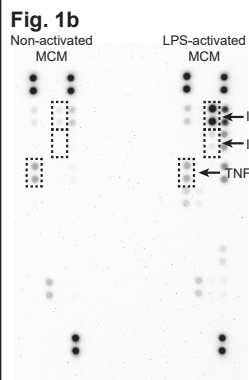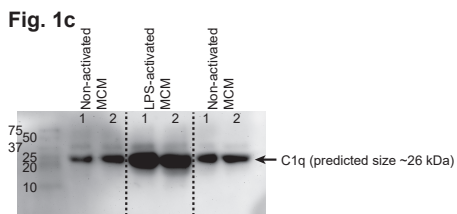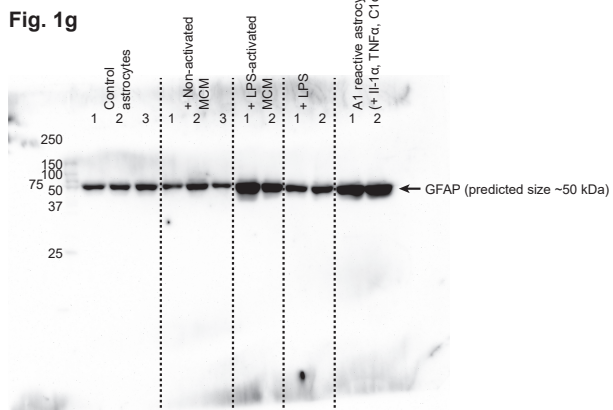

**Extended Data Fig. 6f**

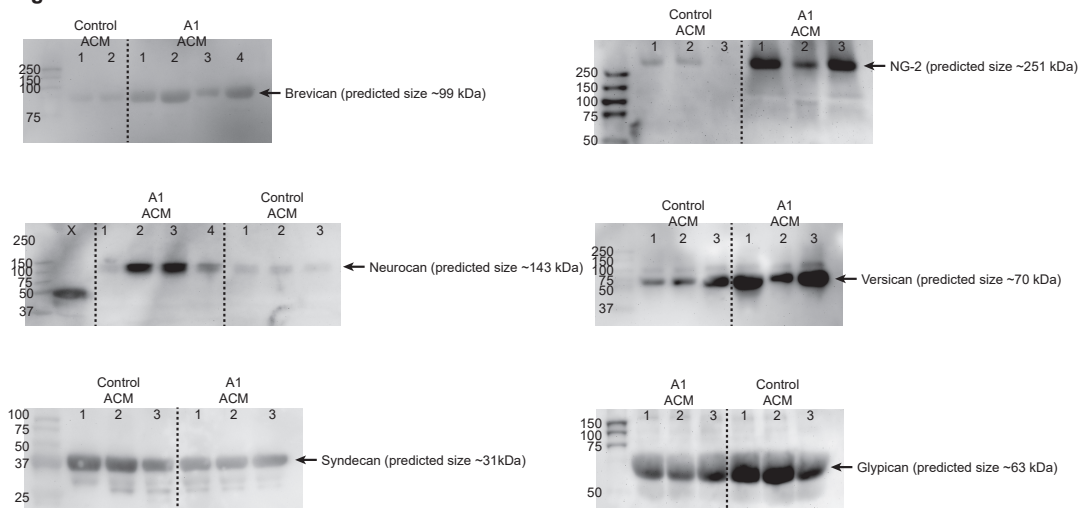

Supplement: NIHMS854157-supplement-Supplemental_Figure_1.pdf [file NIHMS854157-supplement-Supplemental_Figure_1.pdf]
